# Supplementary material for: Non-hematopoietic IL-4Rα expression contributes to fructose-driven obesity and metabolic sequelae
Source: PubMed Central journal article supplement (PMC8528699; doi:10.1038/s41366-021-00902-6), 2021-07-23
Supplement: 41366_2021_902_MOESM2_ESM.pdf [file 41366_2021_902_MOESM2_ESM.pdf]

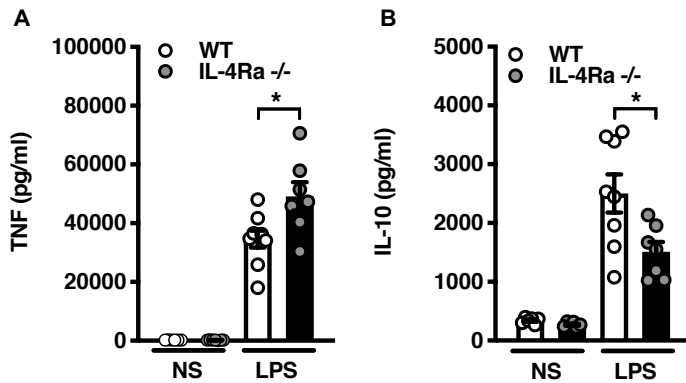

**Supplementary Figure 1. IL-4R $\alpha$  impacts baseline systemic inflammation.** WT and IL-4R $\alpha$ <sup>-/-</sup> mice fed chow diet for 22 weeks where challenged with LPS in the presence of IVCCA antibodies and cytokine production was analyzed by IVCCA-ELISA 4 hours after challenge. **(A)** Systemic TNF levels. **(B)** Systemic IL-10 levels. **(A-B)** One independent experiment, n = 6-8/condition. In bar graphs and line graphs data represents mean +/- SEM. **(A-B)** Unpaired two-tailed student's t-test. \*P < 0.05, \*\*P < 0.01, \*\*\*P < 0.001, \*\*\*\*P < 0.0001.
