# Supplementary material for: Non-hematopoietic IL-4Rα expression contributes to fructose-driven obesity and metabolic sequelae
Source: PubMed Central journal article supplement (PMC8528699; doi:10.1038/s41366-021-00902-6), 2021-07-23

**GLUT5**

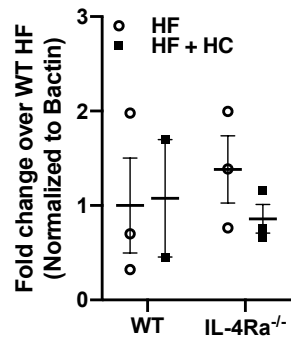

Supplement: 41366_2021_902_MOESM9_ESM.pdf [file 41366_2021_902_MOESM9_ESM.pdf]
